# Supplementary material for: Macrolide analog F806 suppresses esophageal squamous cell carcinoma (ESCC) by blocking β1 integrin activation
Source: PubMed Central journal article supplement (PMC4599248; doi:10.18632/oncotarget.3612), 2015-04-03
Supplement: oncotarget-06-15940-s001.pdf [file oncotarget-06-15940-s001.pdf]

## SUPPLEMENTARY FIGURES AND TABLES

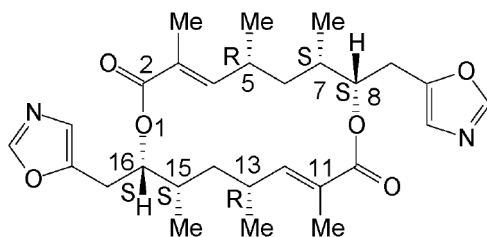

**Supplementary Figure S1: The chemical structure diagram of F806.** The formula of F806 is  $C_{28}H_{38}N_2O_6$ .

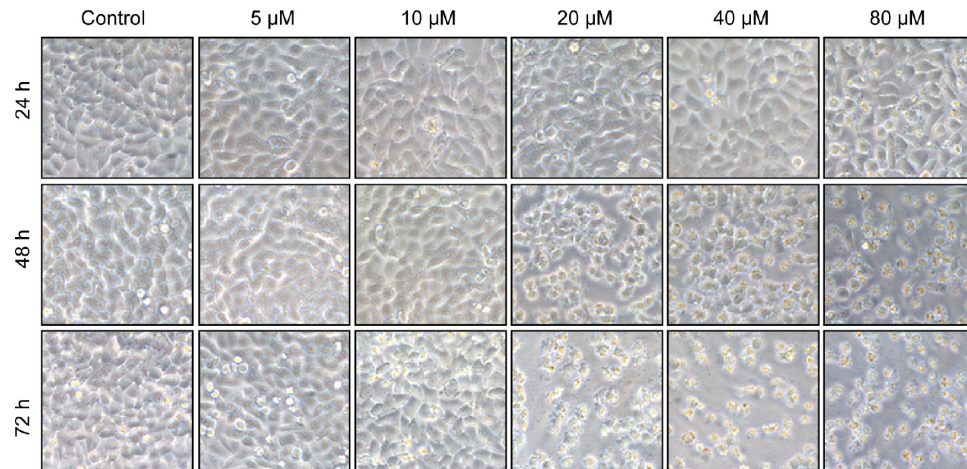

**Supplementary Figure S2: Representative morphological features of F806-treated EC109 cells (Original magnification, 200×).** Various ESCC cells were treated with 0–80 μM F806 for 72 hours and changes in cell morphology were documented by photography every 24 hr.

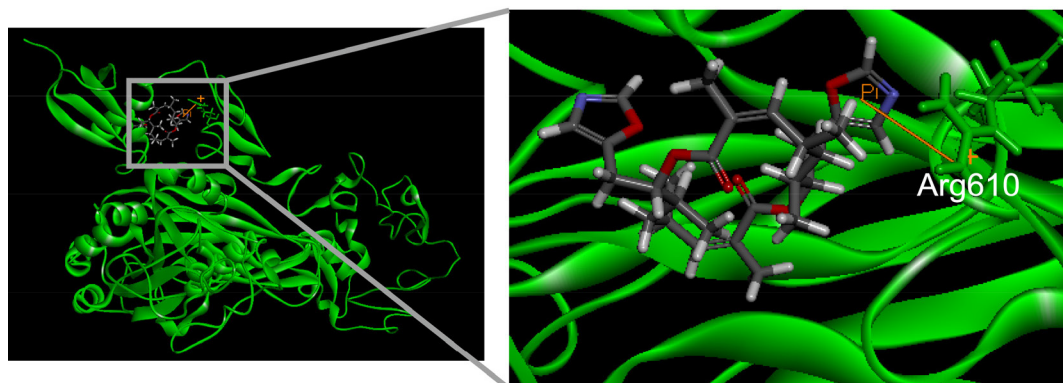

**Supplementary Figure S3: Molecular modeling of surface area diagram indicating Arg610 site of  $\beta$ 1 integrin potentially involved in direct interaction with F806.** The 3D structure model of F806 was obtained from PubChem Compound of National Center for Biotechnology Information (NCBI) (Conglobatin, CID\_6440452). The homology structure model of  $\beta$ 1-integrin was generated with SWISS-MODEL based on primary amino acid sequence of integrin beta-1 isoform 1A precursor from GenBank of NCBI (protein ID: NP\_002202.2). The molecular docking study of F806 with  $\beta$ 1-integrin was performed using Discovery Studio 2.5. Default variables were used according to the manual of Discovery Studio.

**Supplementary Table S1. Summary of cell lines and cell culture general information in this study**

| Cell line Name | Description                              | *Culture medium                                | Cell source                                                           | Ref. |
|----------------|------------------------------------------|------------------------------------------------|-----------------------------------------------------------------------|------|
| EC109          | Esophageal squamous cell carcinoma cells | <sup>1</sup> DMEM with 10%<br><sup>2</sup> NBS | purchased from Type Culture Collection of Chinese Academy of Sciences | (1)  |
| KYSE70         | Esophageal squamous cell carcinoma cells | <sup>3</sup> 1640 with 10% <sup>4</sup> FBS    | gift from Professor Ming-Zhou Guo                                     | (2)  |
| KYSE450        | Esophageal squamous cell carcinoma cells |                                                |                                                                       |      |
| KYSE150        | Esophageal squamous cell carcinoma cells |                                                |                                                                       |      |
| KYSE180        | Esophageal squamous cell carcinoma cells |                                                |                                                                       |      |
| KYSE510        | Esophageal squamous cell carcinoma cells |                                                |                                                                       |      |
| MTLn3          | Rat mammary adenocarcinoma cells         | DMEM / <sup>5</sup> F12 with 10% NBS           | gift from Professor Wei Gu (Shantou University)                       | (3)  |

\*Culture medium, various media were supplemented with penicillin-G (100 units/mL) and streptomycin (100 µg/mL); <sup>1</sup>DMEM, Dulbecco's modified Eagle's medium (GIBCO); <sup>2</sup>NBS, Newborn Bovine Serum (Excell biology. Inc. Shanghai, China); <sup>3</sup>1640, 1640 medium (Thermo, Waltham, MA, USA); <sup>4</sup>FBS, Fetal Bovine Serum (Thermo, Waltham, MA, USA); <sup>5</sup>F12, F-12 nutrient mixture (Ham) powder (GIBCO); Ref., Reference.

## REFERENCES

1. Pan QQ. Studies on esophageal cancer cells in vitro. Proc. Chin. Acad. Med. Sci. Peking Union Med Coll. 1989; 4:52–7.
2. Shimada Y, Imamura M, Wagata T, Yamaguchi N, Tobe T. Characterization of 21 newly established esophageal cancer cell lines. Cancer. 1992; 69:277–84.
3. Neri A, Welch D, Kawaguchi T, Nicolson GL. Development and biologic properties of malignant cell sublines and clones of a spontaneously metastasizing rat mammary adenocarcinoma. Journal of the National Cancer Institute. 1982; 68:507–17.

**Supplementary Table S2. Detailed information about the antibodies used in this study**

| Antibody to               | Mono/polyclonal   | Company (catalogue number)                 | Application(dilution)                               |
|---------------------------|-------------------|--------------------------------------------|-----------------------------------------------------|
| PARP                      | Rabbit monoclonal | Cell Signaling Technology (9542)           | Western blot (1:1000)                               |
| $\beta$ -actin            | Mouse monoclonal  | Santa Cruz Biotechnology (sc-47778)        | Western blot (1:2000)                               |
| p-AKT(Ser473)             | Rabbit monoclonal | Cell Signaling Technology (4060)           | Western blot (1:2000)                               |
| AKT                       | Rabbit monoclonal | Cell Signaling Technology (4691)           | Western blot (1:2000)                               |
| p-ERK1/2 (Tyr204)         | Mouse monoclonal  | Santa Cruz Biotechnology (sc-7383)         | Western blot (1:1000)                               |
| ERK1/2                    | Rabbit polyclonal | Santa Cruz Biotechnology (sc-94)           | Western blot (1:2000)                               |
| p-FAK (Tyr397)            | Rabbit monoclonal | Invitrogen (44-625G)                       | Western blot (1:1000)                               |
| FAK                       | Mouse monoclonal  | BD Transduction Laboratories (610088)      | Western blot (1:1000)                               |
| $\beta$ 1 integrin        | Mouse monoclonal  | BD Transduction Laboratories (610468)      | Western blot (1:1000)                               |
| Paxillin                  | Mouse monoclonal  | BD Transduction Laboratories (610620)      | Western blot (1:2000)<br>Immunofluorescence (1:200) |
| Kindlin-2                 | Mouse monoclonal  | OriGene Technologies, Inc.<br>(TA500505)   | Western blot (1:2000)<br>Immunofluorescence (1:200) |
| Active $\beta$ 1 integrin | Mouse monoclonal  | CHEMICON International, Inc.<br>(MAB2079Z) | IP (2 $\mu$ l in each 500 $\mu$ g protein)          |
| $\alpha$ 5 integrin       | Rabbit polyclonal | Santa Cruz Biotechnology (sc-10729)        | Western blot (1:1000)                               |
| $\beta$ 4 integrin        | Rabbit polyclonal | Santa Cruz Biotechnology (sc-9090)         | Western blot (1:1000)                               |
| Anti-mouse IgG-HRP        | goat              | Santa Cruz Biotechnology (sc-2005)         | Western blotting (1:7500)                           |
| Anti-rabbit IgG-HRP       | goat              | Santa Cruz Biotechnology (sc-2030)         | Western blotting (1:7500)                           |

**Supplementary Table S3. Serum analysis for liver and renal function (mean  $\pm$  SD,  $n = 6$ )**

| Group   | AST (U/L)        | ALT (U/L)       | TBil ( $\mu$ mol/L) | ALB (g/L)      | BUN (mmol/L)  | Cr ( $\mu$ mol/L) |
|---------|------------------|-----------------|---------------------|----------------|---------------|-------------------|
| Control | 205.3 $\pm$ 52.8 | 41.8 $\pm$ 7.7  | 8.4 $\pm$ 4.6       | 18.2 $\pm$ 1.0 | 5.6 $\pm$ 0.9 | 21.5 $\pm$ 4.1    |
| F-4     | 205.3 $\pm$ 29.0 | 39.7 $\pm$ 8.2  | 11.8 $\pm$ 4.9      | 19.5 $\pm$ 1.0 | 5.9 $\pm$ 0.9 | 19.8 $\pm$ 3.5    |
| F-8     | 141.7 $\pm$ 16.6 | 34.3 $\pm$ 23.7 | 9.9 $\pm$ 3.3       | 19.2 $\pm$ 1.8 | 5.6 $\pm$ 0.5 | 18.1 $\pm$ 2.5    |

Blood samples were collected via the ocular vein. Then serum was obtained by centrifugation of whole blood at 3000 rpm for 15 min. Liver function was evaluated based on the serum levels of aspartate aminotransferase (AST), alanine aminotransferase (ALT), total bilirubin (TBil) and albumin (ALB). Nephrotoxicity was determined by blood urea nitrogen (BUN) and creatinine (Cr). All biochemical parameters were determined by an automated biochemical analyzer (Beckman).

**Supplementary Table S4. Routine analysis of complete blood count with differential (mean  $\pm$  SD,  $n = 5$ )**

| Group                      | Control           | F-4               | F-8               |
|----------------------------|-------------------|-------------------|-------------------|
| WBC ( $\times 10^9/L$ )    | 2.9 $\pm$ 1.5     | 2.8 $\pm$ 1.1     | 3.3 $\pm$ 0.9     |
| RBC ( $\times 10^{12}/L$ ) | 9.2 $\pm$ 0.4     | 8.9 $\pm$ 0.3     | 8.7 $\pm$ 0.3     |
| HGB (g/L)                  | 149.4 $\pm$ 6.3   | 146.8 $\pm$ 6.4   | 145.6 $\pm$ 4.7   |
| HCT                        | 0.5 $\pm$ 0.0     | 0.5 $\pm$ 0.0     | 0.4 $\pm$ 0.0     |
| MCV (fL)                   | 54.3 $\pm$ 1.8    | 51.4 $\pm$ 2.2    | 50.6 $\pm$ 2.2    |
| MCH (pg)                   | 16.5 $\pm$ 0.8    | 16.6 $\pm$ 0.8    | 16.7 $\pm$ 0.3    |
| MCHC (g/L)                 | 303.9 $\pm$ 9.6   | 322.0 $\pm$ 3.4   | 331.4 $\pm$ 10.2  |
| PLT ( $\times 10^9/L$ )    | 902.4 $\pm$ 141.3 | 825.0 $\pm$ 176.0 | 788.3 $\pm$ 217.0 |

Blood samples were collected via the ocular vein. Complete blood count (including differential and platelet counts) was determined by an automated blood cell analyzer (Beckman). WBC, White blood count; RBC, Red blood count; HGB, hemoglobin; HCT, hematocrit; MCV, Mean corpuscular volume; MCH, Mean corpuscular hemoglobin; MCHC, Mean corpuscular haemoglobin concentration; PLT, Blood platelet count.
